# Supplementary material for: Characterization of inhalation exposure to gaseous elemental mercury during artisanal gold mining and e-waste recycling through combined stationary and personal passive sampling
Source: Royal Society of Chemistry journal article supplement (doi:10.1039/d0em00494d), 2021-01-01
Supplement: d0em00494d1.pdf [file d0em00494d1.pdf]

## Supporting Information for

### Characterization of Inhalation Exposure to Gaseous Elemental Mercury During Artisanal Gold Mining and E-Waste Recycling Through Combined Stationary and Personal Passive Sampling

Melanie A. Snow,<sup>1</sup> Godfred Darko,<sup>2</sup> Opoku Gyamfi,<sup>2</sup> Eugene Ansah,<sup>2</sup> Knut Breivik,<sup>3,4</sup> Christopher Hoang,<sup>1</sup> Ying Duan Lei,<sup>1</sup> Frank Wania<sup>1,\*</sup>

<sup>1</sup>*Department of Physical and Environmental Sciences, University of Toronto Scarborough, 1265 Military Trail, Toronto, Ontario, Canada M1C 1A4*

<sup>2</sup>*Department of Chemistry, Kwame Nkrumah University of Science & Technology, Kumasi, Ghana*

<sup>3</sup>*Norwegian Institute for Air Research, P.O. Box 100, NO-2027 Kjeller, Norway*

<sup>4</sup>*Department of Chemistry, University of Oslo, P.O. Box 1033, NO-0315 Oslo, Norway*

\*Corresponding author: [frank.wania@utoronto.ca](mailto:frank.wania@utoronto.ca), Tel. +1-416-287-7225

## Table of Content

|            |                                                                                                                 | Page |
|------------|-----------------------------------------------------------------------------------------------------------------|------|
| Figure S1  | Pictures of the ASGM activities in community 1 in Ghana                                                         | S2   |
| Figure S2  | Pictures of the ASGM activities in community 2 in Ghana                                                         | S3   |
| Figure S3  | Pictures of the waste recycling facility in Norway                                                              | S4   |
| Figure S4  | Participant card used to collect all information during personal exposure measurements in Ghana and Norway.     | S5   |
| Section S1 | Instrument Calibration and Sample Analysis                                                                      | S6   |
| Table S1   | Method details for the analysis of PASs for GEM using the AMA-254 analyzer                                      | S6   |
| Table S2   | Method details for the analysis of PASs for GEM using the MA-3000 analyzer                                      | S6   |
| Table S3   | Summary of data from stationary PASs deployed in ASGM Community 1                                               | S8   |
| Table S4   | Summary of data from stationary PASs deployed in ASGM Community 2                                               | S8   |
| Table S5   | Summary of data on daily exposure of participants classified by (self-reported) occupation in ASGM Community 1  | S9   |
| Table S6   | Summary of data on daily exposure of participants classified by (self-reported) occupation in ASGM Community 2  | S12  |
| Table S7   | Summary of data from stationary PASs deployed in e-waste facility                                               | S14  |
| Table S8   | Summary of data on daily exposure of participants classified by (self-reported) occupation in e-waste facility. | S15  |

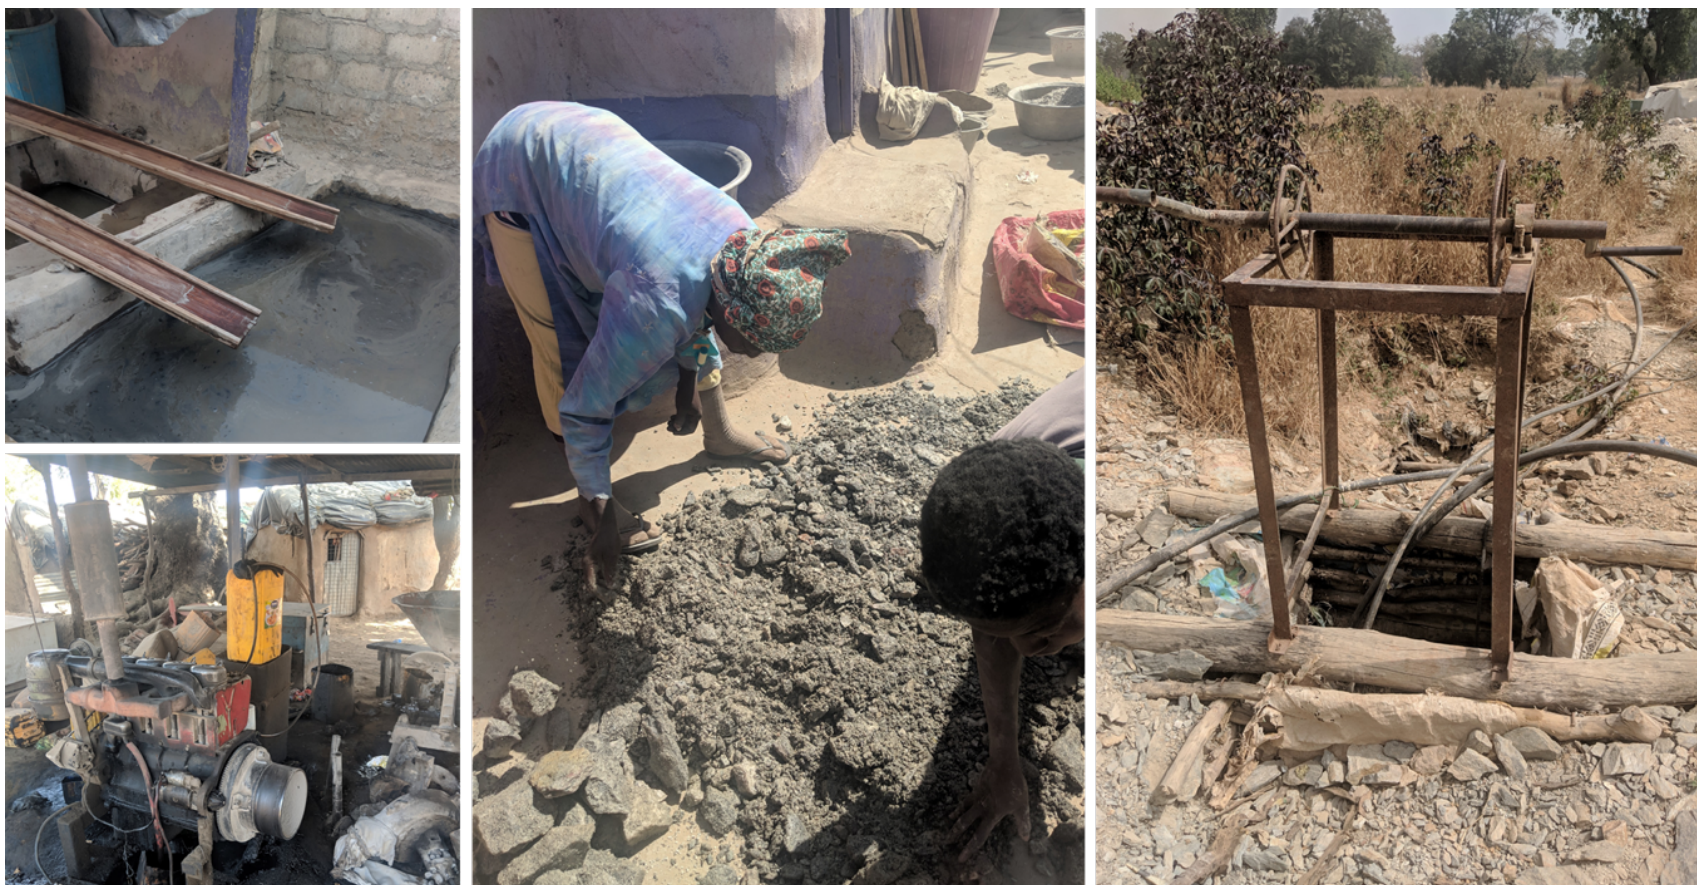

**Figure S1** Pictures of the ASGM activities in community 1 in Ghana

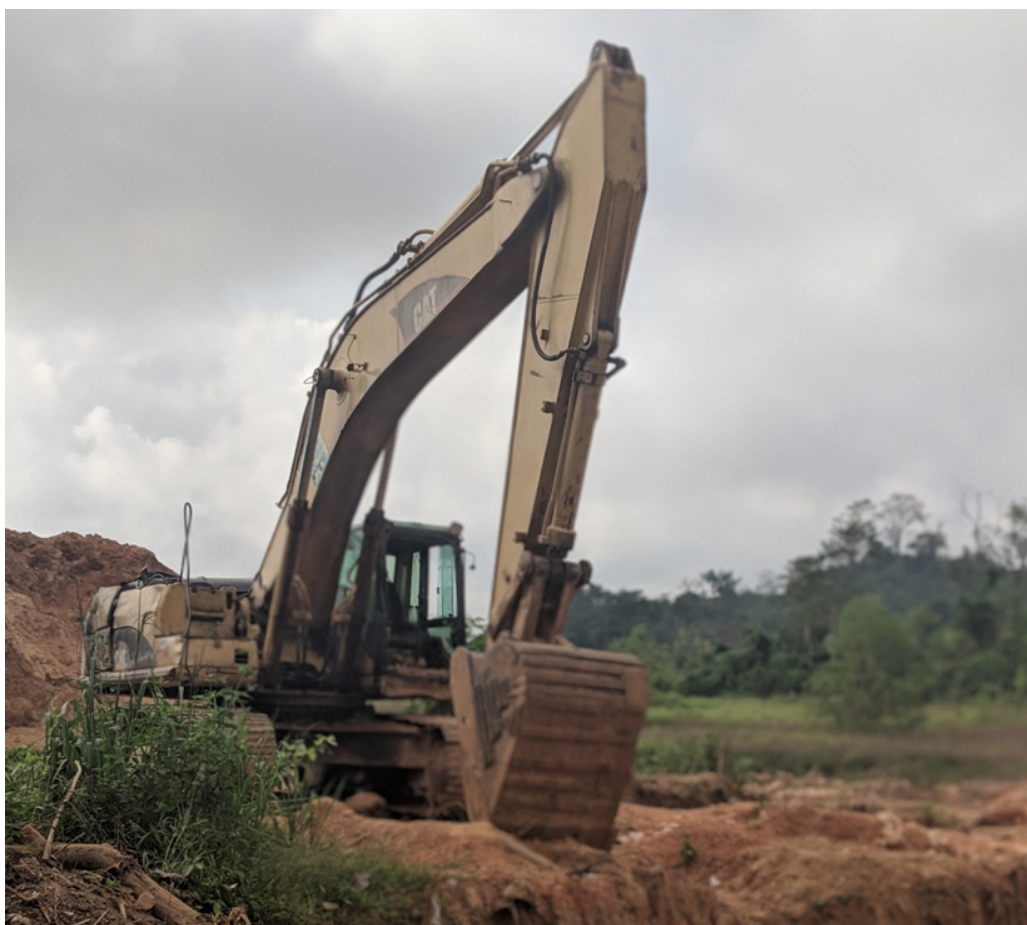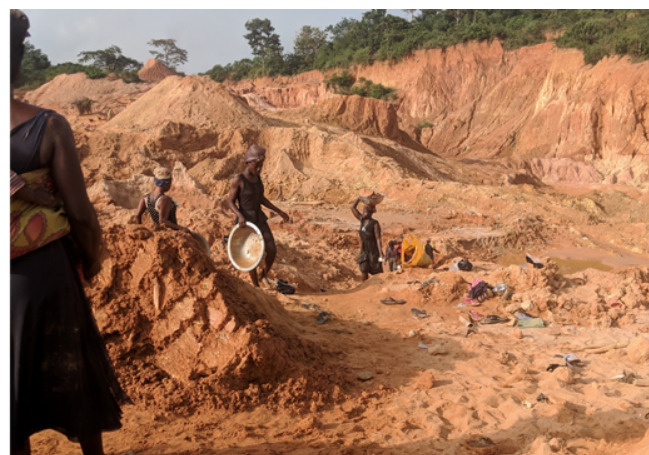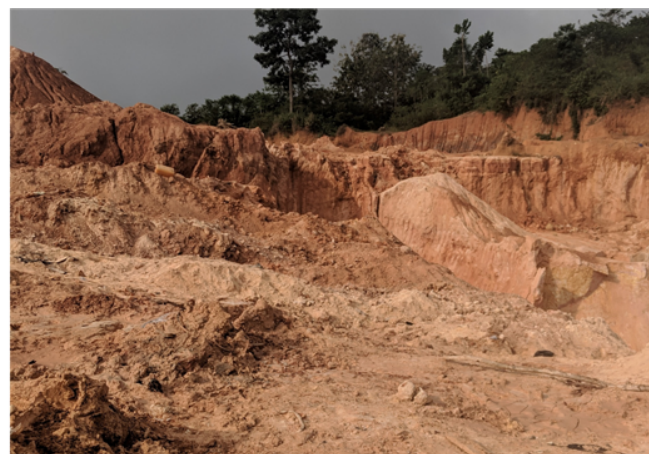

**Figure S2** Pictures of the ASGM activities in community 2 in Ghana.

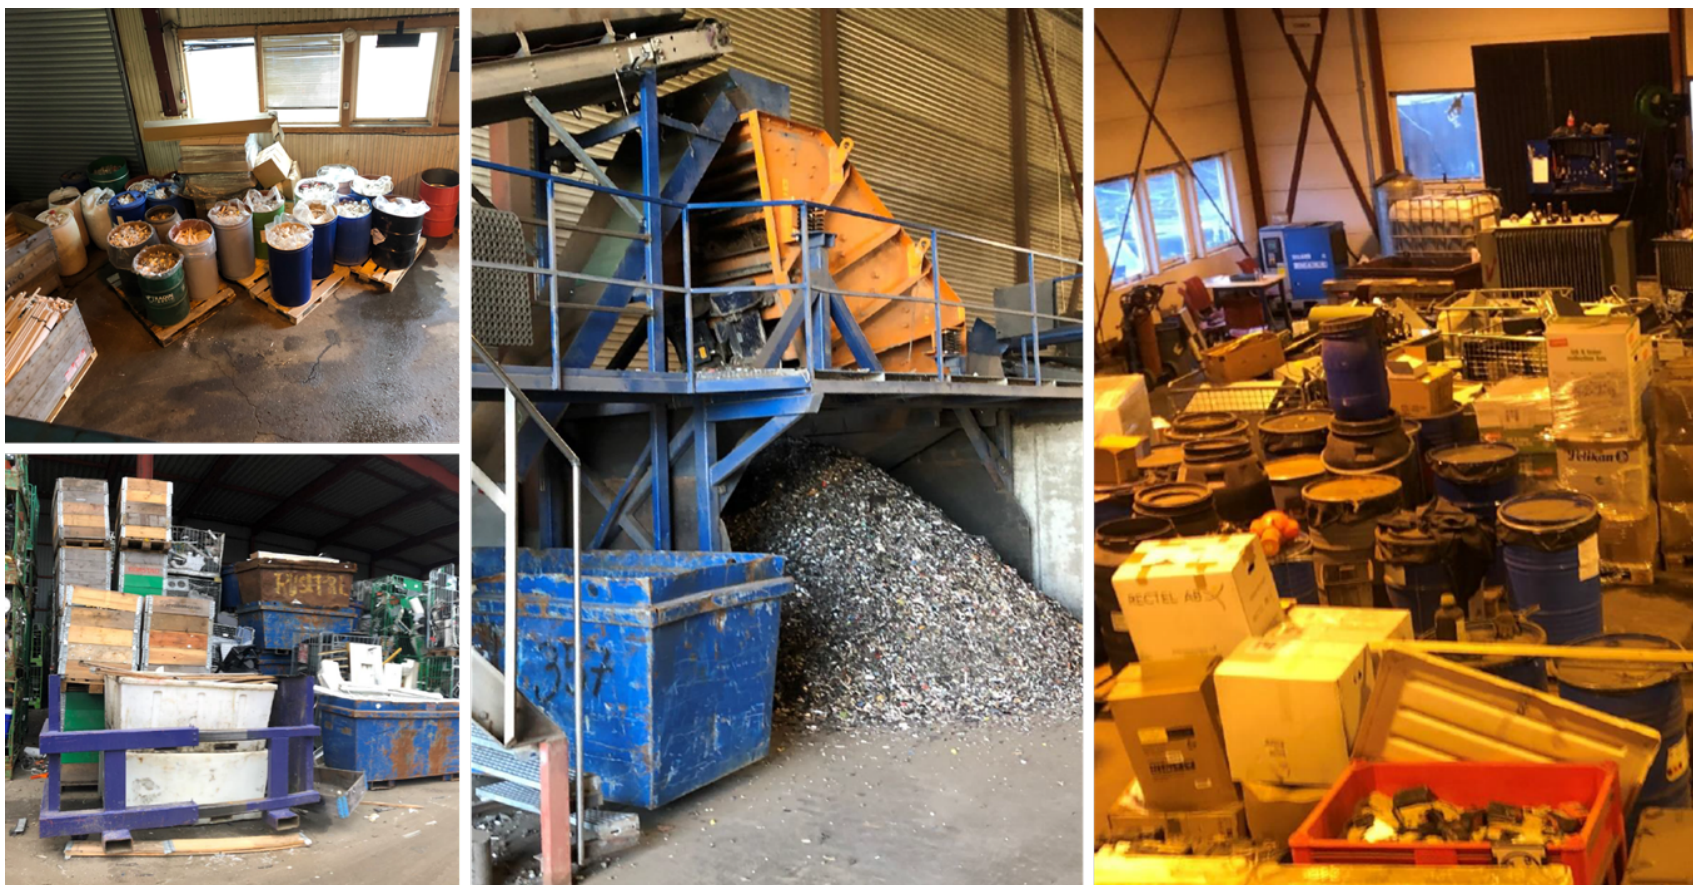

**Figure S3** Pictures of the waste recycling facility in Norway

| Personal Mercury Exposure Study – Participant Card                                  |                                |                                                             |
|-------------------------------------------------------------------------------------|--------------------------------|-------------------------------------------------------------|
| <b><u>Place of Work or Residence:</u></b>                                           |                                |                                                             |
| <b><u>Please Indicate your Job and Required Duties:</u></b>                         |                                |                                                             |
| <b>Age Range:</b>                                                                   | 13-15 <input type="checkbox"/> | 16-17 <input type="checkbox"/> 18+ <input type="checkbox"/> |
| Personal Monitor Information – Please Update Daily                                  |                                |                                                             |
| <b>Day 1</b>                                                                        |                                |                                                             |
| Monitor Number:                                                                     | Time Placed:                   | Time Removed:                                               |
| <b>Day 2</b>                                                                        |                                |                                                             |
| Monitor Number:                                                                     | Time Placed:                   | Time Removed:                                               |
| <b>Day 3</b>                                                                        |                                |                                                             |
| Monitor Number:                                                                     | Time Placed:                   | Time Removed:                                               |
| <b>Day 4</b>                                                                        |                                |                                                             |
| Monitor Number:                                                                     | Time Placed:                   | Time Removed:                                               |
| <b>Day 5</b>                                                                        |                                |                                                             |
| Monitor Number:                                                                     | Time Placed:                   | Time Removed:                                               |
|  |                                |                                                             |

**Figure S4** Participant card used to collect all information during personal exposure measurements in Ghana and Norway.

## Section S1: Instrument Calibration and Sample Analysis

To determine the amount of total mercury adsorbed to the HGR-AC in a PAS or a pumped sampling tube, we applied thermal decomposition, amalgamation and atomic absorption spectroscopy (US EPA Method 7473) using an AMA-254 trace mercury analyzer (Leco Instruments Ltd, ON, CA) or a MA-3000 Direct thermal decomposition mercury analyzer (Nippon Instruments Corporation, TYO, JP) with oxygen as the carrier gas, (see Tables S1 and S2 for method parameters). Calibration standards with Hg concentrations of 0.1, 1, and 10 mg L<sup>-1</sup> were prepared by diluting a 1000 mg L<sup>-1</sup> stock solution of 1000 ± 5 mg L<sup>-1</sup> Hg in 10 % w/w HCl (Inorganic Ventures, Virginia USA) in 1 % w/w metal grade concentrated nitric acid (Millipore Sigma, MA, USA). New Hg standards were prepared every 30 days.

**Table S1** Method details for the analysis of PASs for GEM using the AMA-254 analyzer

| Method Step        | Time (s) | Duty Cycle (%) |
|--------------------|----------|----------------|
| Drying Time        | 30       | 9              |
| Decomposition Time | 330      | 100            |
| Cuvette Clear Time | 45       | -              |
| Dosing Delay Time  | 20       | -              |
| Boat Cooling Time  | 20       | -              |
| <b>Total Time:</b> | 445      |                |

**Table S2** Method details for the analysis of PASs for GEM using the MA-3000 analyzer

| Method Step                   | Time (s) | Temperature | Duty Cycle Range (%) |
|-------------------------------|----------|-------------|----------------------|
| Drying Time                   | 30       | 150         | 10                   |
| 1 <sup>st</sup> Decomposition | 150      | 240         | 10-50                |
| 2 <sup>nd</sup> Decomposition | 120      | 650         | 100                  |
| <b>Total Time:</b>            | 300      |             |                      |

Instrument calibration was completed by the addition of liquid Hg standards to clean, unexposed HGR-AC sorbent, covered with a thin layer (~0.2 g) of sodium carbonate (Na<sub>2</sub>CO<sub>3</sub>). Given the large range of mercury concentrations that may be encountered in the context of personal exposure monitoring along with the uncertainty in potential exposure, instrument calibration was intensive covering a large range to ensure accurate results were obtained. Calibration curves were prepared to maximize the number of analyzed samples falling near the middle of each curve. Both low and high cell calibrations curves contained a minimum of 5 points and were fitted with linear curves. Typical calibration curves for the low cell consisted of 0, 1, 2.5, 5, 10 and 15 ng of Hg, while the high cell curves consisted of 15, 20, 25, 50, 100, 150, 250 and 500 ng of Hg.

For analysis, the sorbent is removed from the holder, analytically weighed, and then transferred into clean sample boats for analysis. Before analysis, samples were ranked from lowest – highest expected Hg content and then ran in this order. Although not a fool-proof method, this reduces the chance of a potential memory effect of a highly contaminated sample inadvertently increasing the observed concentration of a less contaminated sample analyzed subsequently. Samples with low expected levels of Hg were run using a dosing feature which allows multiple

samples to undergo thermal decomposition in succession while each quantity of GEM is trapped in the gold amalgamator tube. The sample then passes through the cuvette system and is detected in its entirety. For samples of high expected concentrations, a small (~0.02 g) sub-sample was analyzed to determine the approximate GEM concentration of the sample. For practicality reasons samples that could not be analyzed in whole due to exceptionally large concentrations were well mixed via manual shaking and three sub-samples of each were analyzed. The mass of Hg detected in the sub-samples was then mass adjusted according to the following equation:

$$mHg_{total} = \sum mHg_{detected} \times \frac{m_{sample}}{\sum m_{analyzed}}$$

Where,  $mHg_{detected}$  is the summation of the quantity of blank-corrected Hg detected in all analyzed sub-samples,  $m_{sample}$  is the mass of HGR-AC for the entire sample (g), and  $m_{analyzed}$  is the summation of the mass of HGR-AC analyzed for all sub-samples (g).

During thermal decomposition of the HGR-AC,  $SO_2$  is released resulting in pre-mature poisoning of the catalyst tube. To minimize the effect and further improve analysis economy catalyst tubes were modified by addition of ~5 g  $Na_2CO_3$  plug and a thin layer of  $Na_2CO_3$  (approximately 0.2 g) was added directly on top of each sample, standard, and reference material before analysis. Anhydrous  $Na_2CO_3$  was purchased commercially (VWR International LLC, ON, CA) and baked overnight at 450 °C before use. The addition of the  $Na_2CO_3$  aids to increase the lifetime of the catalyst.<sup>74</sup>

To maintain effective quality assurance and quality control, analytical and field blanks as well as continuing calibration verification (CCV) and reference standards were utilized. Clean HGR-AC was used as the analytical blank and was analyzed to confirm instrument baseline levels and performance. Samples were blank corrected by multiplying the mean field blank Hg concentration ( $ng\ g_{HGR-AC}^{-1}$ ) by the mass of HGR-AC (g) in a given sample and subtracting this value from the mass of Hg (ng) found in that sample. A high sulfur, bituminous coal standard reference material, NIST 2685c (National Institute of Standards and Technology, Maryland USA) with a concentration of 149.4 ng/g of Hg as well as an in-house prepared powdered HGR-AC sorbent loaded with a Hg concentration of 34.8  $ng/g_{HGR-AC}$  (loaded carbon) were used as reference standards. Alternating reference standards were analyzed every 5-10 samples. Calibration checks were completed every 5-10 samples by alternating the analysis of 5 and 10 ng of Hg using the 0.1 mg/L calibration standard.

Samples were blank corrected by multiplying the mean field blank Hg concentration ( $ng\ g_{HGR-AC}^{-1}$ ) by the mass of HGR-AC (g) in a given sample and subtracting this value from the mass of Hg (ng) found in that sample. The limit of detection (LOD) and limit of quantification (LOQ) in ng of Hg were defined as three and ten times the standard deviation of the field blanks, respectively. The method detection limit (MDL) and method quantification limit (MQL) in  $ng/m^3$  were defined as the LOD and LOQ, respectively, divided by the temperature corrected  $SR$  for a given experiment multiplied by the average deployment time (days) for that experiment.

**Table S3** Summary of data from stationary PASs deployed in ASGM Community 1

| Sample Number | Blank Adjusted Sorbed Hg (ng) | Total Deployment (days) | Air Concentration (ng/m3) | Ratio of Air Concentrations to: |                          |
|---------------|-------------------------------|-------------------------|---------------------------|---------------------------------|--------------------------|
|               |                               |                         |                           | WHO & ATSDR MRL (200 ng/m3)     | ACGIH TLV (25 000 ng/m3) |
| 311           | 180                           | 2.21                    | 630                       | 3.2                             |                          |
| 312           | 200                           | 2.19                    | 700                       | 3.5                             |                          |
| 313           | 120                           | 2.19                    | 360                       | 1.8                             |                          |
| 314           | 210                           | 2.19                    | 620                       | 3.1                             |                          |
| 315           | 180                           | 2.19                    | 530                       | 2.7                             |                          |
| 316           | 170                           | 2.19                    | 510                       | 2.5                             |                          |
| 317           | 130                           | 2.18                    | 380                       | 1.9                             |                          |
| 318           | 120                           | 2.18                    | 840                       | 4.2                             |                          |
| 319           | 140                           | 2.18                    | 410                       | 2.1                             |                          |
| 320           | 170                           | 2.18                    | 1,550                     | 7.7                             | 0.1                      |
| 321           | 300                           | 2.18                    | 900                       | 4.5                             |                          |
| 322           | 1,110                         | 2.18                    | 31,430                    | 157                             | 1.3                      |
| 323           | 540                           | 2.19                    | 1,580                     | 7.9                             | 0.1                      |
| 324           | 420                           | 2.17                    | 1,240                     | 6.2                             |                          |
| 325           | 490                           | 2.17                    | 1,450                     | 7.2                             | 0.1                      |
| 326           | 280                           | 2.16                    | 840                       | 4.2                             |                          |
| 327           | 80                            | 2.18                    | 740                       | 3.7                             |                          |
| 328           | 250                           | 2.16                    | 740                       | 3.7                             |                          |
| 329           | 280                           | 2.16                    | 840                       | 4.2                             |                          |
| 330           | 200                           | 2.15                    | 900                       | 4.5                             |                          |

**Table S4** Summary of data from stationary PASs deployed in ASGM Community 2

| Sample Number | Blank Adjusted Sorbed Hg (ng) | Total Deployment (days) | Air Concentration (ng/m3) | Ratio of Air Concentrations to: |  |
|---------------|-------------------------------|-------------------------|---------------------------|---------------------------------|--|
|               |                               |                         |                           | WHO & ATSDR MRL (200 ng/m3)     |  |
| 335           | 0.2                           | 1.23                    | <LOD                      |                                 |  |
| 338           | 4.2                           | 1.23                    | <LOD                      |                                 |  |
| 339           | 5.5                           | 1.22                    | <LOQ (30)                 | 0.2                             |  |
| 340           | 67.2                          | 1.26                    | 360                       | 1.8                             |  |
| 341           | 30.5                          | 1.26                    | 160                       | 0.8                             |  |
| 342           | 9.0                           | 1.26                    | <LOQ (50)                 | 0.2                             |  |
| 343           | 3.0                           | 1.25                    | <LOD                      |                                 |  |
| 344           | 7.0                           | 1.13                    | <LOQ (40)                 | 0.2                             |  |
| 345           | 8.4                           | 1.12                    | <LOQ (50)                 | 0.2                             |  |

**Table S5** Summary of data on daily exposure of participants classified by (self-reported) occupation in ASGM Community 1.

| Participant Code | Job Description            | Age Range | Day | PAS # | Blank Adjusted Sorbed Hg(ng) | Total Deployment (days) | Air Concentration (ng/m3) | Average Air Concentration of Multiday Participants (ng/m3) | Ratio of Air Concentration to: |                          |                          |                          |
|------------------|----------------------------|-----------|-----|-------|------------------------------|-------------------------|---------------------------|------------------------------------------------------------|--------------------------------|--------------------------|--------------------------|--------------------------|
|                  |                            |           |     |       |                              |                         |                           |                                                            | WHO & ASTDR MRL (2000g/m3)     | ACGIH TLV (25 000 ng/m3) | NIOSH REL (50 000 ng/m3) | OSHA PEL (100 000 ng/m3) |
| A                | Digging, Washing           | 18+       | 1   | 175   | 21.0                         | 0.25                    | 1,090                     | 14,600                                                     | 5                              |                          |                          |                          |
| A                | Digging, Washing           | 18+       | 2   | 197   | 205                          | 0.30                    | 9,070                     |                                                            | 45                             |                          |                          |                          |
| A                | Digging, Washing           | 18+       | 3   | 228   | 765                          | 0.30                    | 33,770                    |                                                            | 169                            | 1                        | 1                        |                          |
| B                | Student                    | 13-15     | 1   | 209   | 4280                         | 0.27                    | 207,510                   | 132,700                                                    | 1038                           | 8                        | 4                        | 2                        |
| B                | Student                    | 13-15     | 3   | 220   | 1400                         | 0.32                    | 57,850                    |                                                            | 289                            | 2                        | 1                        | 1                        |
| C                | Digging, Trading           | 18+       | 2   | 205   | 2530                         | 0.30                    | 113,480                   | 104,300                                                    | 567                            | 5                        | 2                        | 1                        |
| C                | Digging, Trading           | 18+       | 3   | 226   | 2170                         | 0.30                    | 95,060                    |                                                            | 475                            | 4                        | 2                        | 1                        |
| D                | Burning, Digging, Washing  | 18+       | 3   | 221   | 30.9                         | 0.32                    | 1,280                     |                                                            | 6                              |                          |                          |                          |
| E                | Burning, Digging, Washing  | 18+       | 1   | 182   | 52.7                         | 0.26                    | 2,710                     | 39,600                                                     | 14                             |                          |                          |                          |
| E                | Burning, Digging, Washing  | 18+       | 2   | 201   | 1700                         | 0.29                    | 76,530                    |                                                            | 383                            | 3                        | 2                        | 1                        |
| F                | Digging, Washing           | 18+       | 3   | 232   | 41.5                         | 0.29                    | 1,900                     |                                                            | 10                             |                          |                          |                          |
| G                | Supervisor                 | 18+       | 1   | 173   | 133                          | 0.27                    | 6,590                     | 4,600                                                      | 33                             |                          |                          |                          |
| G                | Supervisor                 | 18+       | 2   | 196   | 41.9                         | 0.29                    | 1,880                     |                                                            | 9                              |                          |                          |                          |
| G                | Supervisor                 | 18+       | 3   | 218   | 128                          | 0.32                    | 5,230                     |                                                            | 26                             |                          |                          |                          |
| H                | Burning, Crushing, Digging | 18+       | 2   | 210   | 193                          | 0.29                    | 8,670                     | 217,800                                                    | 43                             |                          |                          |                          |
| H                | Burning, Crushing, Digging | 18+       | 3   | 230   | 9530                         | 0.30                    | 426,850                   |                                                            | 2134                           | 17                       | 9                        | 4                        |
| I                | Drilling                   | 18+       | 1   | 189   | 17.3                         | 0.25                    | 910                       | 900                                                        | 5                              |                          |                          |                          |

|   |                                     |       |   |     |        |      |            |        |      |         |
|---|-------------------------------------|-------|---|-----|--------|------|------------|--------|------|---------|
| I | Drilling                            | 18+   | 2 | 208 | 19.5   | 0.29 | 900        |        | 4    |         |
| I | Drilling                            | 18+   | 3 | 223 | 9.6    | 0.32 | <LOQ (390) |        | 2    |         |
| J | Sieving                             | 18+   | 1 | 188 | 166    | 0.26 | 8,470      | 6,300  | 42   |         |
| J | Sieving                             | 18+   | 2 | 202 | 91.0   | 0.29 | 4,100      |        | 21   |         |
| K | Bar Operator                        | 18+   | 1 | 185 | 36.5   | 0.25 | 1,970      | 6,300  | 10   |         |
| K | Bar Operator                        | 18+   | 2 | 198 | 40.7   | 0.29 | 1,850      |        | 9    |         |
| K | Bar Operator                        | 18+   | 3 | 217 | 370    | 0.33 | 15,000     |        | 75   | 1       |
| L | Burning, Crushing, Digging          | 18+   | 1 | 184 | 17.0   | 0.25 | 910        | 12,400 | 5    |         |
| L | Burning, Crushing, Digging          | 18+   | 2 | 211 | 501    | 0.28 | 23,880     |        | 119  | 1       |
| M | Student                             | 13-15 | 3 | 231 | 113    | 0.30 | 5,080      |        | 25   |         |
| N | Sieving                             | 18+   | 1 | 190 | 96.7   | 0.24 | 5,250      | 2,700  | 26   |         |
| N | Sieving                             | 18+   | 2 | 194 | 38.4   | 0.30 | 1,700      |        | 8    |         |
| N | Sieving                             | 18+   | 3 | 216 | 30.1   | 0.33 | 1,210      |        | 6    |         |
| O | Sieving                             | 18+   | 1 | 187 | 84.0   | 0.25 | 4,470      | 4,000  | 22   |         |
| O | Sieving                             | 18+   | 2 | 207 | 106    | 0.30 | 4,700      |        | 24   |         |
| O | Sieving                             | 18+   | 3 | 224 | 66.0   | 0.32 | 2,710      |        | 14   |         |
| Q | Sieving                             | 18+   | 2 | 212 | 128    | 0.31 | 5,520      | 3,800  | 28   |         |
| Q | Sieving                             | 18+   | 3 | 215 | 54.4   | 0.33 | 2,170      |        | 11   |         |
| R | Weaving                             | 18+   | 1 | 186 | 57.3   | 0.25 | 3,050      | 2,300  | 15   |         |
| R | Weaving                             | 18+   | 2 | 206 | 48.1   | 0.29 | 2,170      |        | 11   |         |
| R | Weaving                             | 18+   | 3 | 222 | 42.6   | 0.33 | 1,730      |        | 9    |         |
| S | Burning, Crushing, Digging, Washing | 18+   | 1 | 174 | 152    | 0.26 | 7,670      | 4,500  | 38   |         |
| S | Burning, Crushing, Digging, Washing | 18+   | 2 | 203 | 27.8   | 0.29 | 1,260      |        | 6    |         |
| T | Sieving                             | 18+   | 3 | 234 | 34.8   | 0.29 | 1,570      |        | 8    |         |
| U | Digging, Washing                    | 18+   | 1 | 181 | 150    | 0.26 | 7,660      | 54,400 | 38   |         |
| U | Digging, Washing                    | 18+   | 2 | 200 | 2,200  | 0.29 | 101,200    |        | 506  | 4 2 1   |
| V | Washing                             | 18+   | 1 | 179 | 31.8   | 0.26 | 1,620      | 36,500 | 8    |         |
| V | Washing                             | 18+   | 2 | 204 | 1,600  | 0.30 | 71,430     |        | 357  | 3 1 1   |
| W | Burning, Crushing, Digging, Washing | 18+   | 3 | 233 | 12,000 | 0.30 | 531,350    |        | 2657 | 21 11 5 |
| X | Chop Bar Operator                   | 18+   | 1 | 192 | 1.2    | 0.25 | <LOD       |        |      |         |
| X | Chop Bar Operator                   | 18+   | 2 | 195 | 5.0    | 0.30 | <LOD       |        | 1    |         |

|   |                   |     |   |     |       |      |            |        |     |   |   |   |  |
|---|-------------------|-----|---|-----|-------|------|------------|--------|-----|---|---|---|--|
| X | Chop Bar Operator | 18+ | 3 | 219 | 22.9  | 0.33 | 910        |        | 5   |   |   |   |  |
| Y | Driver            | 18+ | 1 | 176 | 1,300 | 0.43 | 39,700     |        | 198 | 2 | 1 | 0 |  |
| Y | Driver            | 18+ | 2 | 199 | 238   | 0.32 | 9,870      | 63,200 | 49  |   |   |   |  |
| Y | Driver            | 18+ | 3 | 229 | 3,260 | 0.31 | 139,910    |        | 700 | 6 | 3 | 1 |  |
| Z | Seamstress        | 18+ | 1 | 183 | 13.3  | 0.28 | <LOQ (620) |        | 3   |   |   |   |  |
| Z | Seamstress        | 18+ | 2 | 213 | 94.4  | 0.29 | 4,250      | 3,000  | 21  |   |   |   |  |
| Z | Seamstress        | 18+ | 3 | 225 | 45.9  | 0.33 | 1,840      |        | 9   |   |   |   |  |

**Table S6** Summary of data on daily exposure of participants classified by (self-reported) occupation in ASGM Community 2.

| Participant Code | Job Description  | Day | PAS # | Blank Adjusted Sorbed Hg (ng) | Total Deployment (days) | Air Concentration (ng/m <sup>3</sup> ) | Average Air Concentration of Multiday Participants (ng/m <sup>3</sup> ) | Ratio of Air Concentration to WHO & ASTDR MRL (200 ng/m <sup>3</sup> ) |
|------------------|------------------|-----|-------|-------------------------------|-------------------------|----------------------------------------|-------------------------------------------------------------------------|------------------------------------------------------------------------|
| 1                | Researcher       | 1   | 243   | 7.4                           | 0.41                    | <LOQ (240)                             |                                                                         |                                                                        |
| 2                | Researcher       | 1   | 244   | 5.1                           | 0.40                    | <LOQ (170)                             |                                                                         |                                                                        |
| 2                | Researcher       | 2   | 267   | 0.1                           | 0.37                    | <LOD                                   |                                                                         |                                                                        |
| 3                | Researcher       | 1   | 241   | 19.1                          | 0.41                    | 610                                    | 410                                                                     | 3.1                                                                    |
| 3                | Researcher       | 2   | 266   | 5.8                           | 0.38                    | <LOQ (200)                             |                                                                         |                                                                        |
| 4                | Guide            | 1   | 250   | 4.9                           | 0.34                    | <LOQ (190)                             |                                                                         |                                                                        |
| 5                | Shop Attendant   | 1   | 237   | 1.0                           | 0.35                    | <LOD                                   |                                                                         |                                                                        |
| 5                | Shop Attendant   | 2   | 289   | 0.6                           | 0.27                    | <LOD                                   |                                                                         |                                                                        |
| 6                | Food Seller      | 1   | 258   | 4.4                           | 0.30                    | <LOQ (190)                             |                                                                         |                                                                        |
| 7                | Food Seller      | 1   | 236   | 3.1                           | 0.35                    | <LOD                                   |                                                                         |                                                                        |
| 8                | Motorcycle Rider | 1   | 239   | 8.3                           | 0.30                    | <LOQ (360)                             |                                                                         |                                                                        |
| 9                | Cocoa Farmer     | 1   | 242   | 7.6                           | 0.30                    | <LOQ (330)                             |                                                                         |                                                                        |
| 10               | Soil Carrier     | 1   | 247   | 1.7                           | 0.34                    | <LOD                                   |                                                                         |                                                                        |
| 10               | Soil Carrier     | 2   | 276   | 0.0                           | 0.34                    | <LOD                                   |                                                                         |                                                                        |
| 11               | Soil Carrier     | 1   | 248   | 17.1                          | 0.31                    | 730                                    | 650                                                                     | 3.6                                                                    |
| 11               | Soil Carrier     | 2   | 275   | 11.6                          | 0.27                    | 560                                    |                                                                         | 2.8                                                                    |
| 12               | Soil Carrier     | 1   | 252   | 5.0                           | 0.28                    | <LOQ (240)                             | 440                                                                     | 3.2                                                                    |
| 12               | Soil Carrier     | 2   | 274   | 15.9                          | 0.33                    | 640                                    |                                                                         |                                                                        |
| 13               | Soil Carrier     | 1   | 245   | 6.4                           | 0.30                    | <LOQ (280)                             |                                                                         |                                                                        |
| 14               | Soil Carrier     | 1   | 246   | 3.8                           | 0.32                    | <LOQ (160)                             |                                                                         |                                                                        |
| 15               | Soil Carrier     | 1   | 249   | 2.0                           | 0.32                    | <LOD                                   |                                                                         |                                                                        |

|    |                              |   |     |      |      |            |      |      |
|----|------------------------------|---|-----|------|------|------------|------|------|
| 16 | Soil Carrier                 | 1 | 255 | 0.2  | 0.33 | <LOD       |      |      |
| 17 | Soil Carrier, Supervisor     | 1 | 254 | 4.1  | 0.28 | <LOQ (200) |      |      |
| 18 | Soil Carrier, Nursing Mother | 1 | 253 | 20.1 | 0.37 | 720        |      | 3.6  |
| 19 | Crushing                     | 1 | 288 | 3.4  | 0.27 | <LOQ (170) |      |      |
| 20 | Digging                      | 1 | 287 | 20.7 | 0.27 | 1,010      |      | 5.0  |
| 21 | Crushing                     | 1 | 286 | 0.6  | 0.27 | <LOD       |      |      |
| 22 | Crushing, Digging            | 2 | 285 | 3.5  | 0.27 | <LOQ (170) |      |      |
| 23 | Shop Attendant (day 1)       | 1 | 238 | 0.0  | 0.35 | <LOD       |      |      |
| 23 | Crushing (day 2)             | 2 | 284 | 1.2  | 0.27 | <LOD       |      |      |
| 24 | Crushing                     | 2 | 283 | 3.3  | 0.27 | <LOQ (160) |      |      |
| 25 | Digging                      | 2 | 282 | 141  | 0.27 | 6,830      |      | 34.2 |
| 26 | Crushing, Digging            | 2 | 281 | 0.1  | 0.27 | <LOD       |      |      |
| 27 | Crushing, Digging            | 2 | 279 | 1.1  | 0.27 | <LOD       |      |      |
| 28 | Crushing, Digging            | 2 | 278 | 1.0  | 0.27 | <LOD       |      |      |
| 29 | Crushing, Digging            | 2 | 277 | 45.8 | 0.27 | 2,210      |      | 11.1 |
| 30 | Crushing, Digging            | 1 | 257 | 19.8 | 0.28 | 920        | 1180 | 4.6  |
| 30 | Crushing, Digging            | 2 | 273 | 30.9 | 0.28 | 1,430      |      | 7.2  |
| 31 | Crushing, Digging            | 1 | 256 | 1.6  | 0.28 | <LOD       |      |      |
| 31 | Crushing, Digging            | 2 | 272 | 37.4 | 0.28 | 1,730      |      | 8.7  |
| 32 | Crushing, Digging            | 2 | 271 | 11.6 | 0.29 | 530        |      | 2.6  |
| 33 | Crushing, Digging            | 1 | 260 | 129  | 0.28 | 6,190      | 3390 | 30.9 |
| 33 | Crushing, Digging            | 2 | 270 | 13.0 | 0.29 | 590        |      | 3.0  |
| 34 | Crushing, Digging            | 1 | 259 | 12.2 | 0.28 | 580        | 480  | 2.9  |
| 34 | Crushing, Digging            | 2 | 269 | 8.2  | 0.29 | <LOQ (370) |      |      |
| 35 | Crushing, Digging            | 1 | 251 | 31.8 | 0.32 | 1,320      | 1780 | 6.6  |
| 35 | Crushing, Digging            | 2 | 268 | 51.9 | 0.31 | 2,230      |      | 11.2 |
| 36 | Crushing, Digging, Grinding  | 1 | 262 | 8.2  | 0.23 | 470        |      | 2.4  |
| 36 | Crushing, Digging, Grinding  | 2 | 265 | 1.0  | 0.38 | <LOD       |      |      |
| 37 | Crushing, Digging, Grinding  | 1 | 263 | 3.7  | 0.23 | <LOQ (210) | 530  |      |
| 37 | Crushing, Digging, Grinding  | 2 | 264 | 24.8 | 0.38 | 860        |      | 4.3  |
| 38 | Smelting/Burning             | 1 | 240 | 46.5 | 0.36 | 1710       |      | 8.5  |

**Table S7** Summary of data from stationary PASs deployed in e-waste facility

| Sample Number | Blank Adjusted Sorbed Hg (ng) | Total Deployment (days) | Air Concentration (ng/m3) | Comparison to WHO & ATSDR MRL (200 ng/m3) |
|---------------|-------------------------------|-------------------------|---------------------------|-------------------------------------------|
| 1             | 33.6                          | 4.13                    | 58.9                      | 0.3                                       |
| 2             | 17.8                          | 4.12                    | 31.2                      | 0.2                                       |
| 3             | 1.6                           | 4.12                    | 2.8                       |                                           |
| 4             | 1.8                           | 4.13                    | 3.1                       |                                           |
| 5             | 0.9                           | 4.13                    | 1.6                       |                                           |
| 6             | 2.2                           | 4.13                    | 3.8                       |                                           |
| 7             | 1.7                           | 4.13                    | 3.0                       |                                           |
| 9             | 42.9                          | 4.14                    | 75.0                      | 0.4                                       |
| 11            | 184.8                         | 4.14                    | 322.0                     | 1.6                                       |
| 12            | 653.8                         | 4.14                    | 1140.0                    | 5.7                                       |
| 13A           | 0.8                           | 4.07                    | 1.4                       |                                           |
| 13B           | 1.1                           | 4.07                    | 1.9                       |                                           |
| 14            | 0.8                           | 4.09                    | 1.4                       |                                           |
| 15            | 0.6                           | 4.08                    | 1.1                       |                                           |
| 16            | 0.5                           | 4.07                    | 0.9                       |                                           |
| 17            | 1.0                           | 4.07                    | 1.7                       |                                           |
| 18A           | 1.7                           | 4.07                    | 3.0                       |                                           |
| 18B           | 1.7                           | 4.07                    | 3.0                       |                                           |
| 19            | 0.6                           | 4.07                    | 1.0                       |                                           |
| 20            | 0.6                           | 3.88                    | 1.2                       |                                           |

**Table S8** Summary of data on daily exposure of participants classified by (self-reported) occupation in e-waste facility.

| Participant Code | Age Range | Job Description                                                                       | Day Participated - Sample Number | Blank Adjusted Sorbed Hg (ng) | Total Deployment (days) | Air Concentration (ng/m <sup>3</sup> ) | Average Air Concentration (ng/m <sup>3</sup> ) | Comparison to WHO & ATSDR MRL (200 ng/m <sup>3</sup> ) |
|------------------|-----------|---------------------------------------------------------------------------------------|----------------------------------|-------------------------------|-------------------------|----------------------------------------|------------------------------------------------|--------------------------------------------------------|
| 1                | 40+       | Plant Operator – Alternates between operating machines and sorting waste each day     | 1 - Y11<br>2 - Y12               | 12.8<br>85.6                  | 0.50<br>0.33            | 380<br>3,850                           | 2,120                                          | 1.9<br>19.2                                            |
| 2                | 40+       | Excavator Operator – Alternates between operating machines and sorting waste each day | 1 - Y21<br>2 - Y22<br>3 - Y23    | 2.7<br>61.1<br>1.8            | 0.50<br>0.33<br>0.34    | 80<br>2,750<br>80                      | 970                                            | 0.4<br>13.7<br>0.4                                     |
| 3                | 18-39     | General Employee – Sorting                                                            | 1 - Y31<br>2 - Y32<br>3 - Y33    | 7.1<br>35.7<br>6.9            | 0.50<br>0.34<br>0.34    | 210<br>1,590<br>300                    | 700                                            | 1.1<br>7.9<br>1.5                                      |
| 4                | 40+       | General Employee – Sorting                                                            | 1 - Y41<br>2 - Y42               | 13.9<br>28.1                  | 0.34<br>0.34            | 620<br>1,250                           | 930                                            | 3.1<br>6.2                                             |
| 5                | 18-39     | General Employee – Sorting                                                            | 1 - Y51<br>2 - Y52               | 16.6<br>74.5                  | 0.30<br>0.34            | 850<br>3,250                           | 2,050                                          | 4.2<br>16.3                                            |
| 6                | 18-39     | General Employee – Sorting                                                            | 1 - Y61<br>2 - Y62<br>3 - Y63    | 17.3<br>35.3<br>31.0          | 0.30<br>0.35<br>0.34    | 880<br>1,500<br>1,380                  | 1,250                                          | 4.4<br>7.5<br>6.9                                      |
| 7                | 18-39     | Operations Manager – Drives a truck which transports shredded waste                   | 1 - Y71<br>2 - Y72<br>3 - Y73    | 2.2<br>1.6<br>4.8             | 0.42<br>0.35<br>0.33    | 80<br>70<br>220                        | 120                                            | 0.4<br>0.3<br>1.1                                      |
| 8                | 40+       | Accounts Officer – Finances, not involved directly with waste recycling               | 1 - Y81<br>2 - Y82<br>3 - Y83    | 0.0<br>0.0<br>0.0             | 0.32<br>0.31<br>0.28    | <LOD<br><LOD<br><LOD                   |                                                |                                                        |
